# Supplementary material for: Activin-like kinase 5 (ALK5) inactivation in the mouse uterus results in metastatic endometrial carcinoma
Source: PubMed Central journal article supplement — Proc Natl Acad Sci U S A. 2019 Jan 17;116(9):3883–92. doi: 10.1073/pnas.1806838116 (PMC6397539; doi:10.1073/pnas.1806838116), 2019-01-17
Supplement: pnas.1806838116.sapp.pdf [file pnas.1806838116.sapp.pdf]

## Supplementary Information for

### **Activin-like kinase 5 (ALK5) inactivation in the mouse uterus results in metastatic endometrial carcinoma**

Diana Monsivais<sup>a,e,f\*</sup>, Jia Peng<sup>a,f,g\*</sup>, Yibin Kang<sup>g</sup>, Martin M. Matzuk<sup>a,b,c,d,e,f,h</sup>

Departments of <sup>a</sup>Pathology and Immunology, <sup>b</sup>Molecular and Human Genetics, <sup>c</sup>Molecular and Cellular Biology, and <sup>d</sup>Pharmacology and Chemical Biology, and Centers for <sup>e</sup>Drug Discovery and <sup>f</sup>Reproductive Medicine Baylor College of Medicine, Houston, TX 77030. <sup>g</sup> Department of Molecular Biology, Princeton University, Princeton University, Princeton, NJ 08544. <sup>h</sup>Program in Developmental Biology, Baylor College of Medicine, Houston, TX 77030.

\* D.M. and J.P. contributed equally to this work.

#### *Corresponding author:*

Martin M. Matzuk, M.D., Ph.D.  
mmatzuk@bcm.edu

#### **This PDF file includes:**

Figs. S1 to S7  
Table S1 and S2

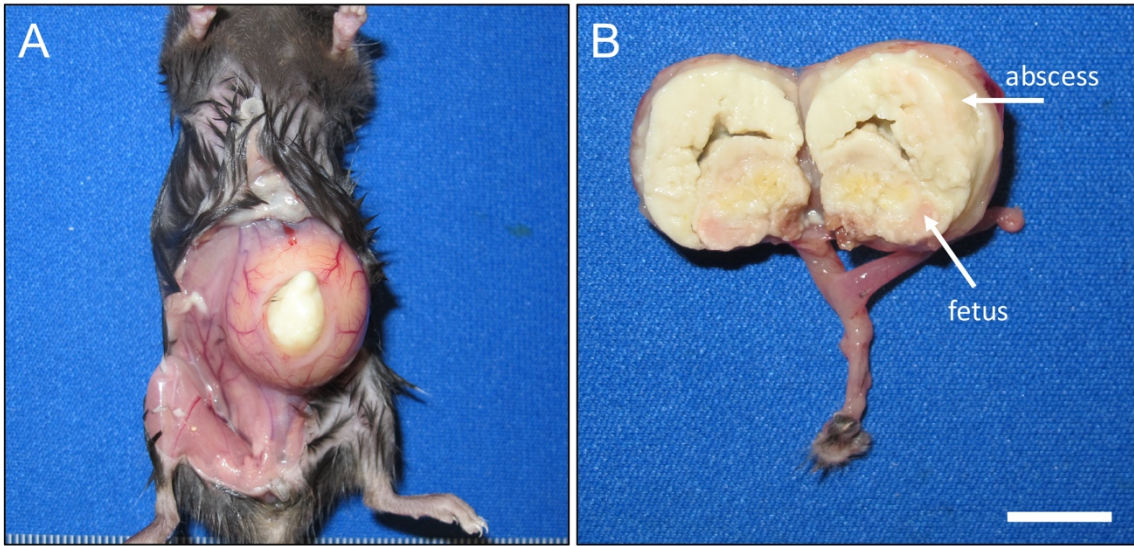

**Fig. S1. Mortality of *Alk5* cKO females during pregnancy.** A) *Alk5* cKO mouse was sacrificed and dissected at 6.9 months of age due to the presence of an enlarged abdominal mass. This mouse was mated continuously to a WT male until the time of dissection. B) Intrauterine mass shows the presence of an enclosed abscess and a dead fetus. Size bar equals 1 cm.

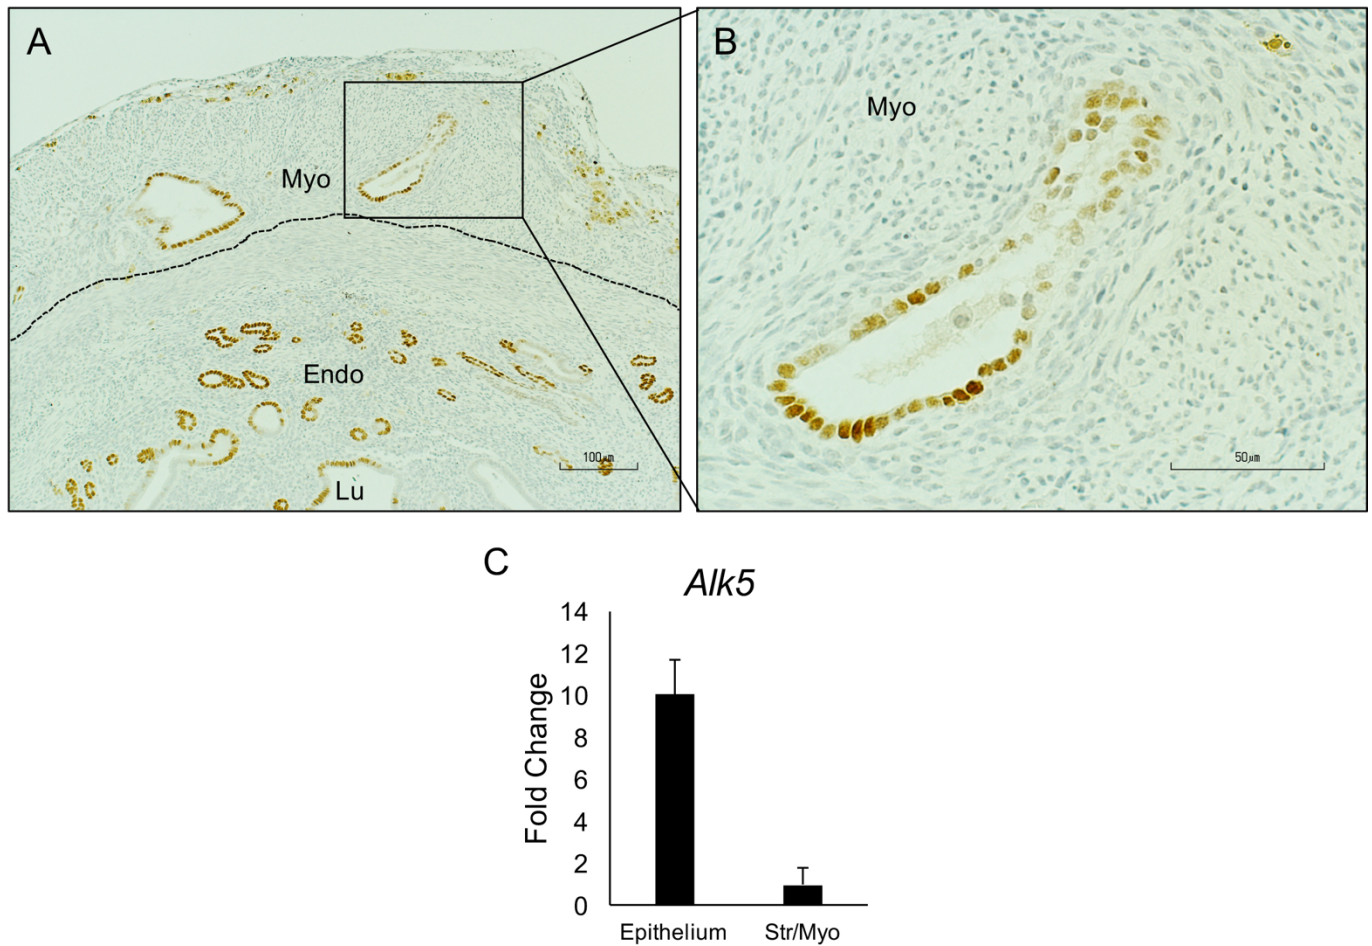

**Fig. S2. FOXA2 expression in the glands of *Alk5* cKO mice with cancer and tissue-specific *Alk5/Tgfb1* expression.** A-B) Immunohistochemistry of FOXA2 in the uterine cancers of *Alk5* cKO mice at low (A) and high magnification (B). FOXA2 expression is detected in the normal uterine glands that are within the endometrium and in the invasive glands within the myometrium. C) Comparison of the gene expression of *Alk5/Tgfb1* in the luminal uterine epithelium and stromal/myometrial compartments of WT mice using quantitative real time PCR.

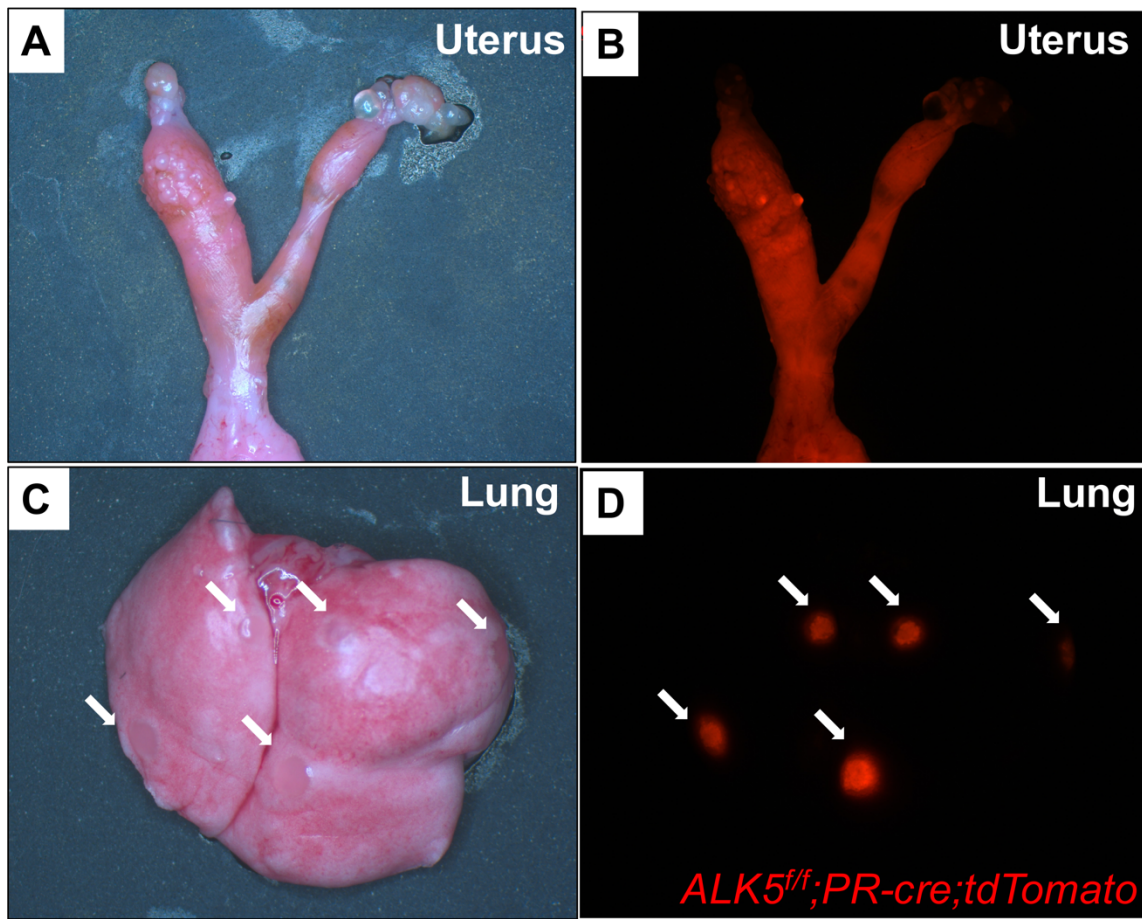

**Fig. S3. Lung metastases in *Alk5* cKO mice originate in the reproductive tract.** A,C) Gross uterus (A) and lungs (C) from an *Alk5<sup>flox/flox</sup>-PRcre<sup>+/-</sup>-Rosa26<sup>tdTomato</sup>* mouse imaged under a light stereomicroscope. B,D) Uterus and lungs from an *Alk5<sup>flox/flox</sup>-PRcre<sup>+/-</sup>-Rosa26<sup>tdTomato</sup>* mouse imaged under fluorescence stereomicroscope. Pictured is a uterus from an adult mouse mated continuously for six months beginning at six weeks of age.

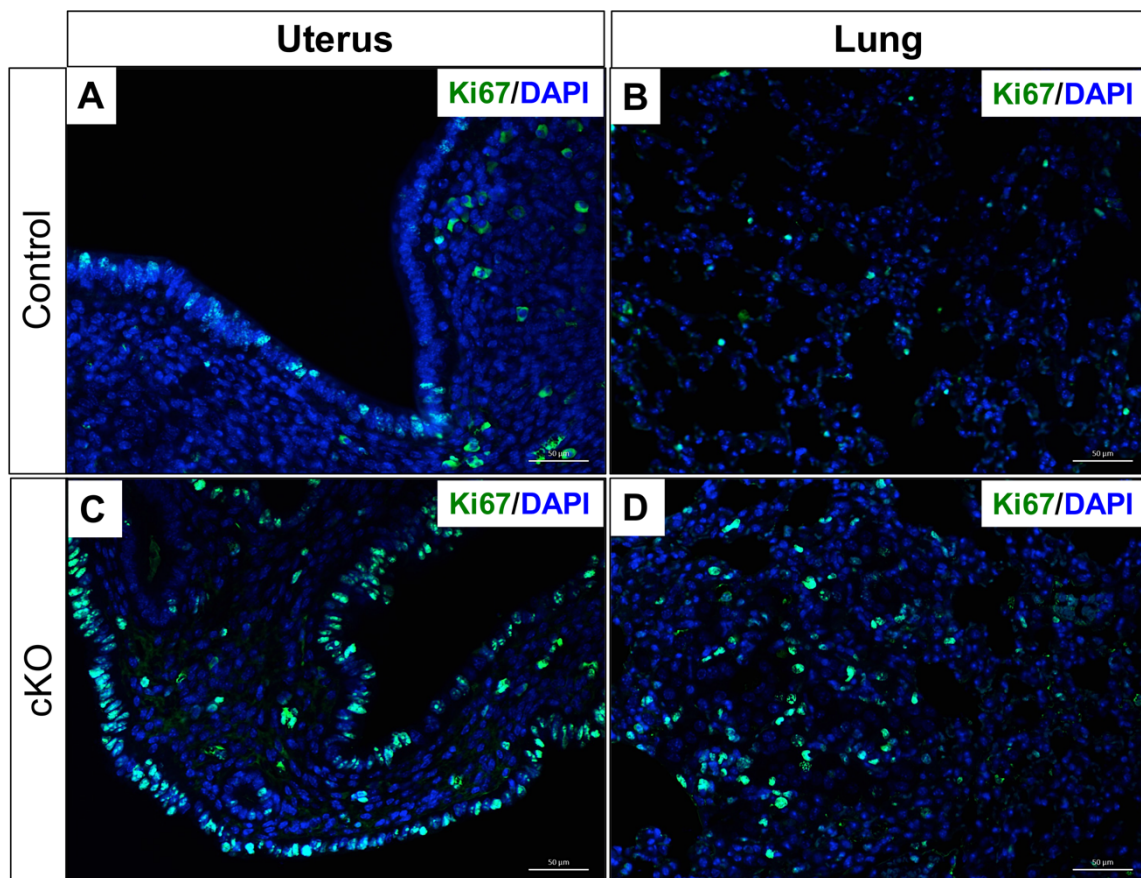

**Fig. S4. Uterine and lung tissues from *Alk5* cKO mice show increased proliferation compared to control tissues.** A-B) Uterus and lung sections from a control mouse stained with Ki67 and DAPI. C-D) Uterus and lung sections from an *Alk5* cKO mouse stained with Ki67 and DAPI. Tissues were collected from mice at six months of age following continuous mating to male mice beginning at six weeks of age. Size bar equals 50  $\mu\text{m}$ .

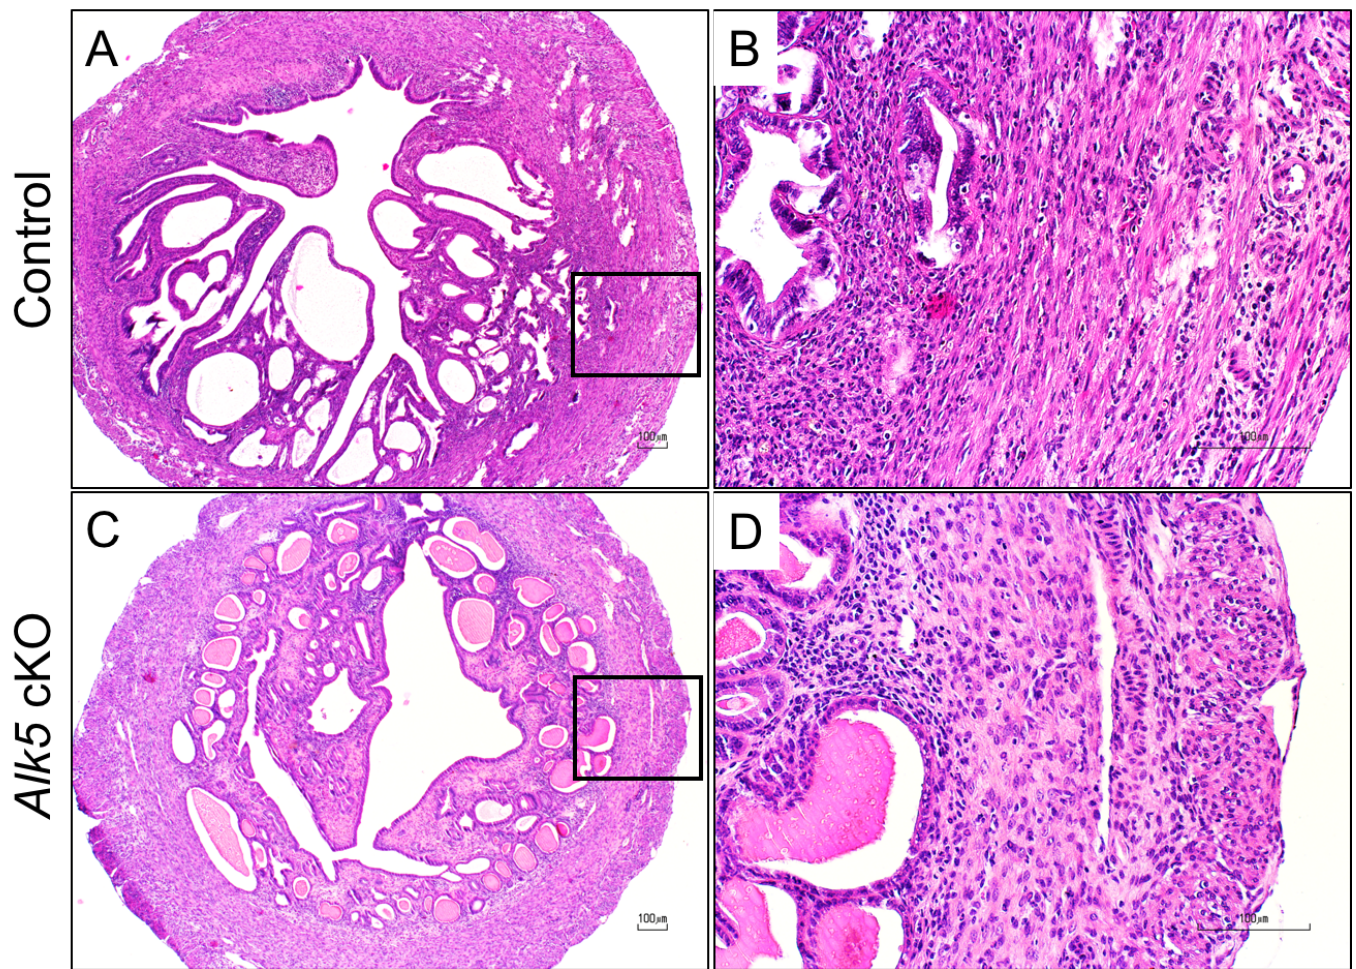

**Fig. S5. Uteri from ovariectomized control and *Alk5* cKO mice after long-term E2 treatment.** A-D) Uterine cross-sections from control (A-B) and *Alk5* cKO (C-D) mice. Mice were ovariectomized, then treated with an E2-secreting pellet for three months (0.025mg/pellet/90days). Tissues were sectioned and stained with H&E. Size bar equals 100 μm.

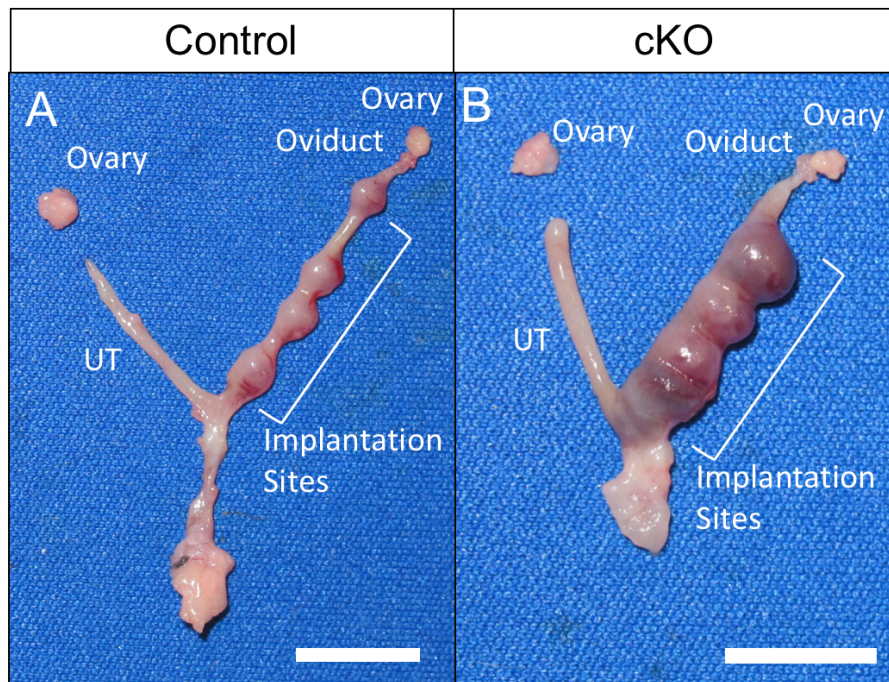

**Fig. S6. Unilateral oviduct removal in control and *Alk5* cKO mice.** The oviduct was removed from the left uterine horn in both control (A) and *Alk5* cKO (B) mice. Implantation sites are observed in the uterine horns with the intact oviduct from both the control and *Alk5* cKO mice. Uteri were dissected from 4.8-month-old mice mated continuously for three months. Size bar equals 1cm.

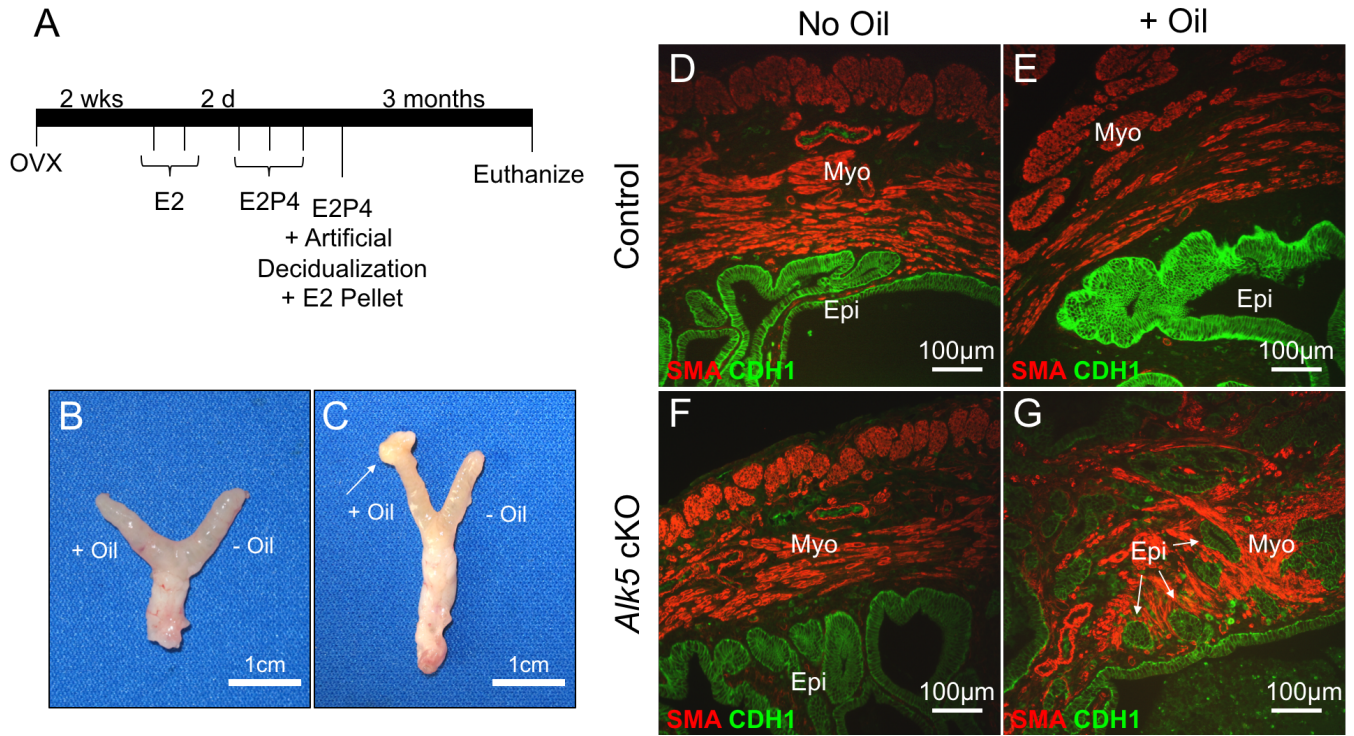

**Fig. S7. Cancer development in a model of artificial decidualization.** A) Experimental scheme used to induce artificial decidualization. Mice were ovariectomized (OVX), treated with 100 ng E2 (2 days), 1mg P4 + 6.7 ng E2 (4 days) and on the 4<sup>th</sup> day, injected (intrauterine) with oil, followed by a long-term E2 regimen (0.025mg/pellet/90days). B-C) Uteri from control (B) and *Alk5* cKO mice (C) after an artificial decidual stimulus (Oil) was delivered to one uterine horn. D-G) Uterine cross-sections from control (D-E) and *Alk5* cKO (F-G) mice stained with smooth muscle actin (SMA, red) and E-cadherin (CDH1, green). Uterine horns pictured in D, F did not receive the artificial stimulus. Uterine horns in E, G received an oil injection as the decidual stimulus. Size bar equals 1cm (B,C) or 100 µm (D-G).

**Table 1. *Alk5* cKO mice develop endometrial tumors and lung metastases**

| Group                       | Genotype          | Age Mating Began (weeks) | Days until death | Endometrial tumors | Lung Metastases |
|-----------------------------|-------------------|--------------------------|------------------|--------------------|-----------------|
| Virgin mice                 | Control           | not mated                | dissect at 120   | no                 | no              |
|                             | Control           | not mated                | dissect at 225   | no                 | no              |
|                             | Control           | not mated                | dissect at 320   | no                 | no              |
|                             | Control           | not mated                | dissect at 320   | no                 | no              |
|                             | <i>Alk5</i> cKO   | not mated                | dissect at 120   | no                 | no              |
|                             | <i>Alk5</i> cKO   | not mated                | dissect at 120   | no                 | no              |
|                             | <i>Alk5</i> cKO   | not mated                | dissect at 225   | no                 | no              |
| Mated to fertile males      | Control           | 6                        | dissect at 240   | no                 | no              |
|                             | Control           | 6                        | dissect at 240   | no                 | no              |
|                             | Control           | 6                        | dissect at 320   | no                 | no              |
|                             | Control           | 6                        | dissect at 320   | no                 | no              |
|                             | <i>Alk5</i> cKO   | 6                        | dissect at 240   | yes                | yes             |
|                             | <i>Alk5</i> cKO   | 6                        | dissect at 225   | yes                | yes             |
|                             | <i>Alk5</i> cKO   | 6                        | dissect at 180   | yes                | yes             |
|                             | <i>Alk5</i> cKO   | 6                        | dissect at 150   | yes                | yes             |
|                             | <i>Alk5</i> cKO   | 6                        | dissect at 165   | yes                | yes             |
|                             | <i>Alk5</i> cKO*  | 6                        | 28               | no                 | no              |
|                             | <i>Alk5</i> cKO*  | 6                        | 105              | no                 | no              |
|                             | <i>Alk5</i> cKO*  | 6                        | 21               | no                 | no              |
|                             | <i>Alk5</i> cKO*  | 6                        | 31               | no                 | no              |
|                             | <i>Alk5</i> cKO*  | 7                        | 112              | no                 | no              |
|                             | <i>Alk5</i> cKO*  | 6                        | 142              | no                 | no              |
|                             | <i>Alk5</i> cKO*  | 6                        | 28               | no                 | no              |
|                             | <i>Alk5</i> cKO*  | 7                        | 112              | no                 | no              |
|                             | <i>Alk5</i> cKO*  | 8                        | 80               | no                 | no              |
| Mated to vasectomized males | Control           | 6                        | dissect at 240   | no                 | no              |
|                             | Control           | 6                        | dissect at 240   | no                 | no              |
|                             | Control           | 6                        | dissect at 240   | no                 | no              |
|                             | <i>Alk5</i> cKO** | 6                        | dissect at 240   | no                 | no              |
|                             | <i>Alk5</i> cKO** | 6                        | dissect at 240   | no                 | no              |
|                             | <i>Alk5</i> cKO** | 6                        | dissect at 240   | no                 | no              |
|                             | <i>Alk5</i> cKO** | 6                        | dissect at 240   | no                 | no              |

|                                         |                 |           |                                     |    |    |
|-----------------------------------------|-----------------|-----------|-------------------------------------|----|----|
| Ovariectomy<br>+ E2 for three<br>months | Control         | not mated | dissect after 3<br>months E2 pellet | no | no |
|                                         | Control         | not mated | dissect after 3<br>months E2 pellet | no | no |
|                                         | <i>Alk5</i> cKO | not mated | dissect after 3<br>months E2 pellet | no | no |
|                                         | <i>Alk5</i> cKO | not mated | dissect after 3<br>months E2 pellet | no | no |
|                                         | <i>Alk5</i> cKO | not mated | dissect after 3<br>months E2 pellet | no | no |

\*mice died during pregnancy with intrauterine abscess or hemorrhage

\*\*mice developed a cervical/vaginal mass

**Table S2. List of Antibodies and dilutions**

| Antibody    | Catalog Number | Vendor                               | Species | Dilution |
|-------------|----------------|--------------------------------------|---------|----------|
| TTF-1       | sc-13040       | Santa Cruz                           | Rabbit  | 1:200    |
| KRT8        | TROMA-I        | Developmental Studies Hybridoma Bank | Rat     | 1:50     |
| Ki67        | 550609         | BD                                   | Mouse   | 1:300    |
| ER $\alpha$ | MS-354-P0      | Thermo Fisher                        | Mouse   | 1:500    |
| PAX8        | ACI438         | BioCare                              | Mouse   | 1:200    |
| SMA/ACTA2   | ab5694         | Abcam                                | Rabbit  | 1:200    |
| PR          | sc-7208        | Santa Cruz                           | Rabbit  | 1:200    |
| FOXA2       | ab108422       | Abcam                                | Rabbit  | 1:1000   |
| E-Cadherin  | 610181         | BD Biosciences                       | Mouse   | 1:200    |
